# Supplementary material
Source: PubMed Central journal article supplement (PMC2599818)
Supplement: 108.141655_1.pdf [file 108.141655_1.pdf]

## The two-sample Kolmogorov-Smirnov Test

We used a two-sample Kolmogorov-Smirnov test to quantitatively compare the virtual test data set  $X_i$  with simulated probe data-sets  $Y_j$ . The principle of the test can be found in text books on statistics (e.g. (1, 2)), and shall be briefly sketched here.

Let us assume two samples  $X_i$  and  $Y_j$  with size  $n$  and  $m$  drawn from continuous distributions. The two samples can be characterized by their empirical cumulative density functions

$$cdf_x(x) = \frac{\#i : X_i \leq x}{n} \text{ and } cdf_y(x) = \frac{\#i : Y_i \leq x}{m}$$

which are defined as the proportion of observed values that are less than or equal to  $x$ . The test is based on finding the maximum distance  $D = \max(|cdf_x(x) - cdf_y(x)|)$ . Suppose that both  $X_i$  and  $Y_j$  are drawn from the same distribution, and their values are such that  $D=d$ . Since a large value of  $D$  would appear to be inconsistent with the null hypothesis that both samples are drawn from the same distribution, it follows that the P-value for this data-set is given by

$$P - \text{value} = \text{prob}(D \geq d)$$

Note that  $\text{prob}$  specifies the probability for  $D \geq d$  under the assumption that  $H_0$  is correct. The key argument for the versatility of the Kolmogorov-Smirnov test is the proposition that  $\text{prob}(D \geq d)$  is the same for any continuous distribution. The distribution of  $D$  as function of  $n$  and  $m$  can be found in tables (2) and is implemented for calculation of the P-value in the Matlab function `kstest2` (The MathWorks, Natick, MA).

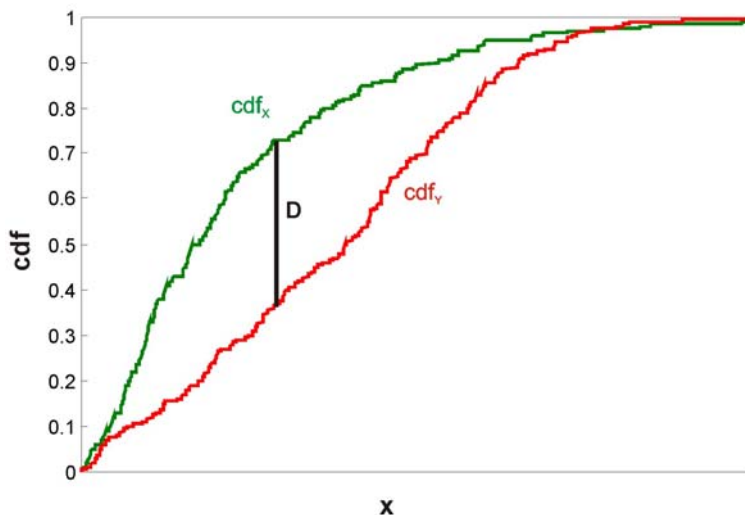

1. Ross, S. M. Introduction to probability and statistics for engineers and scientists, 3<sup>rd</sup> edition, Elsevier, San Diego
2. Conover, W. J.. Practical nonparametric statistics, 3<sup>rd</sup> edition, Wiley, New York

# Supplemental Figure 1

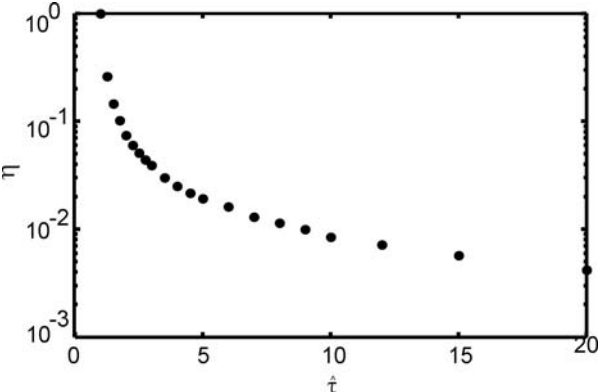

**Supplemental Figure 1.** Escape-probability  $\eta$  as a function of  $\hat{\tau}$ . Data were obtained from Monte Carlo simulations of hop diffusion, by determining  $\hat{\tau}$  for various  $\eta$ .

## Supplemental Figure 2

A

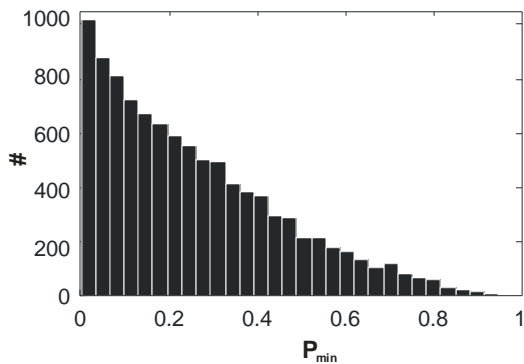

B

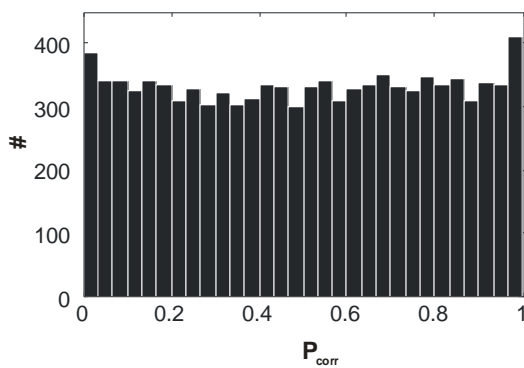

**Supplemental Figure 2:** Correction of the P-value distribution. We simulated free diffusion according to Fig. 3 and calculated the minimum  $P_{\min}$  of the P-values obtained for  $n=1$ ,  $n=2$  and  $n=3$ . The distribution is clearly non-uniform (A). Using the transformation  $P_{\text{corr}} = 1 - (1 - P_{\min})^{n_{\max}}$ , a uniform distribution of  $P_{\text{corr}}$  is generated, which allows for interpretation of  $P_{\text{corr}}$  as P-value (B).

### Supplemental Figure 3

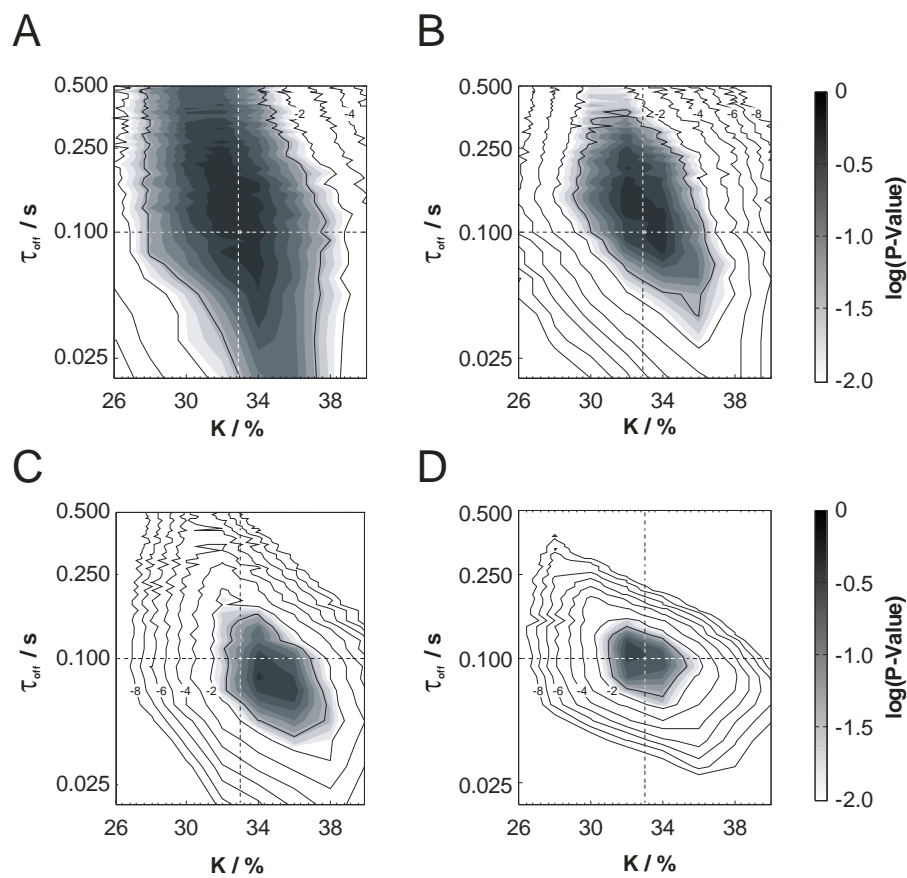

**Supplemental Figure 3:** P-values as function of  $K$  and  $\tau_{\text{off}}$  for various ratios  $D_A/D_{AB}$ . Tests were performed on the data-sets described in Fig. 12C. The panels show results for  $D_A/D_{AB}=2$  (A), 3 (B), 4 (C) and 10 (D). Interestingly, already a ratio of three is sufficient to significantly restrict the parameter range for  $\tau_{\text{off}}$ . Data obtained for a ratio of 2, however, contain hardly any information on the interaction lifetime.
